# Supplementary material
Source: PubMed Central journal article supplement (PMC4640735)

## **Supplementary Materials:**

Materials and Methods

Supplementary Figure Legends S1-S11

External Databases S1-S4

References (S1-7)

Supplementary Tables 1-3

## **Supplementary Materials:**

### **Materials and Methods:**

Müller Glia Culture

Müller Glia were cultured and purified from post-natal day 12 (P12) C57BL/6 J mouse retinas as described (*1*).

Immunohistochemistry (IHC).

Eyecups or retinal explants were fixed in 4% paraformaldehyde for 25 minutes or 2% paraformaldehyde for 45 minutes, respectively, at room temperature. After a single PBS wash, samples were cryoprotected in 30% sucrose overnight at 4°C. Eyecups or explants were embedded in OCT compound (Sakura Finetek) and sectioned at 12-14  $\mu$ m. For IHC analysis, sections were blocked with 10% normal horse serum (Vector Labs) containing 0.5% Triton X-100 for 1 hour at room temperature, then primary antibodies were applied and incubated at 4°C overnight. Primary antibodies used are listed in Table 1. Sections were washed three times with PBS, and incubated with secondary antibodies (Life Technologies) for 1.5 hours at room temperature. Sections were then incubated in DAPI (Sigma) for 10 minutes. EdU staining was carried out using the Click-iT EdU Kit (Invitrogen). After two PBS washes and DI water wash, sections were coverslipped, and confocal microscopy was performed using an Olympus FluoView FV1000.

Intravitreal Injections.

Postnatal (P) 12 mice and adult mice were anesthetized with isoflurane and 1.5 or 2  $\mu$ L respectively of vehicle (PBS) or N-Methyl-D-aspartic acid (NMDA) (100 mM) (Sigma-Aldrich) was injected intravitreally using a Hamilton syringe with a 32 gauge needle (Hamilton). The other eye was uninjected or injected with vehicle.

## Light Damage

Adult albino mice were continuously exposed to 10,000 lux light for 8 hours as described previously (2). Unanesthetized albino mice were exposed to diffuse, cool, white fluorescent light coming from the top of the cage. Food and water were provided *ad libitum* but were placed in the cage to avoid blocking light exposure. The pupils were not dilated. Average luminance was measured on the cage floor using a light meter, and was approximately 10,000 lux. Mice were exposed to the light for 8 hrs (8am–4pm), and returned under normal lighting (12 hr on/12 hr off cyclic light) for recovery before analysis. Only mice with the genotype Leucine(L)/Methionine(M) or L/L for Retinal Pigment Epithelium-specific 65 kDa (RPE65) were used.

## Quantitative RT-PCR (RT-PCR).

Retinas were isolated and RNA isolation was performed using Trizol (Invitrogen). cDNA was made using the iScript cDNA synthesis kit (Bio-Rad), and qPCR was performed using SSO Fast reagent (Bio-Rad). Primers used are listed in Supplementary Table 2.

## Nuclei Isolation

Cells were removed by accutase treatment followed by washing with PBS (lacking  $\text{Ca}^{2+}$  and  $\text{Mg}^{2+}$ ) and centrifugation (600g). Cells were resuspended in buffer A (15 mM Tris-HCl, 15 mM NaCl, 60 mM KCl, 1 mM EDTA, 0.5 mM EGTA, 0.5 mM spermidine) with 0.07% IGEPAL and incubated for 10 minutes on ice to extract nuclei, followed by centrifugation (600g) and resuspension in buffer A (supplemented with  $\text{Ca}^{2+}$ ) to two million nuclei per mL. DNase I treatment was conducted by incubating nuclei with limiting concentrations of DNase I for 3 minutes at 37°C. The reaction was terminated with stop buffer (50 mM Tris-HCl, 100 mM NaCl, 0.1% SDS, 100 mM EDTA, 1 mM spermidine, 0.5 spermine, pH 8.0) and incubated with proteinase K and RNase A at 55°C for 3 hours.

## Sequencing/Mapping/Hotspots

DNA fragments less than 750bp were isolated by sucrose ultracentrifugation followed by end-repair and ligation with Illumina compatible adapters. See ref for details on mapping DNase I hypersensitive sites. Sequence reads of 36bp were mapped to the mouse reference genome (NCBI37) using Bowtie (v 0.12.7) (3). Aligned reads were summed within 150bp windows in 20bp step intervals to generate signal tracks using BEDOPS (4). The Hotspot algorithm was used to detect local enrichments of sequence tags against a local background model based on a binomial distribution (5). See <http://www.uwencode.org/proj/hotspot/> for a

detailed description. Enriched regions of DNase I hypersensitivity (hotspots) were scanned internally for maxima ( $\pm 75$ bp, defined as peaks). A false discovery rate of 1% was used by generating simulated datasets of random reads at identical sequencing depth.

#### Generation of *TetO-Ascl1* mice

*TetO-Ascl1-IRES-EGFP* transgene was constructed by placing the full-length cDNA of mouse *Ascl1* under the control of *tetO* promoter, and the internal ribosome entry site (IRES) and enhanced green fluorescent protein (EGFP) cDNA are further placed downstream of *Ascl1*. Mice carrying the transgene were generated by the pronuclear injection using inbred FVB mice as described previously (6). *GLAST-CreER* mice carry the *CreER* transgene knocked into the locus of the glutamate transporter gene *GLAST* (7). Mice carrying *CAG-CAT (CC)-EGFP* Cre-reporter allele was used to track the fate of recombined cells as EGFP<sup>+</sup> cells as described previously (8). P12-P18 mice were injected with 0.8 mg tamoxifen (Sigma) in 100  $\mu$ L corn oil and adults with 1.5 mg tamoxifen in 100  $\mu$ L corn oil, intraperitoneally to activate overexpression of *Ascl1* and GFP to label recombinant cells.

#### Figure Legends S1-S7

Figure S1. Expression of progenitor genes in Hes5-GFP FACS sorted progenitors (P0) and Müller glia declines rapidly between P0 and P7 as progenitors become postmitotic and Müller glia are formed. Key proneural transcription factors, like *Ascl1*, are not expressed in Müller glia and do not get upregulated after retinal damage, either from NMDA or excessive light. Green to red = low to high expression. Note GFAP is increased strongly in Müller glia after either type of injury.

Figure S2. Retinal section of adult *Ascl1*-GFP mouse after 5 daily tamoxifen injections (1.5mg/100  $\mu$ L). A substantial fraction of the total Müller glia in the retina express the transgene.

Figure S3. Left panel. Higher magnification of retinal section of adult *Ascl1*-GFP mouse after 5 daily tamoxifen injections labeled with *Ascl1* antibody (red), shows that the Müller glia express detectable levels of *Ascl1*. Right panel. RT-PCR for *Ascl1* and progenitor genes from retinas of adult *Ascl1*-GFP mouse after 5 daily tamoxifen injections (1.5mg/100  $\mu$ L). Collected 3 weeks later. *Ascl1*-GFP cycle difference from control (CC-GFP).

Figure S4. A-D. Intraocular injections of NMDA in either P12 or adult mice leads to the death of the vast majority of ganglion cells (Brn3+, green) seen in representative regions of flatmounted retinas, two days after NMDA treatment. E-F. Sections through the retina of a mouse that received an intraocular injection of NMDA at P12 labeled for HuC/D (red) to reveal amacrine cells. G. Quantitation of amacrine cells in P12 retina showing significant reduction in HuC/D+ cells in the INL after NMDA treatment.

Figure S5. A. Section through retina of an adult *Ascl1*-GFP mouse that received 6 hours of intense light to induce light damage, labeled for Sox9 (white) and Otx2 (red). Many *Ascl1*-GFP+ Müller glia express Otx2 after damage and some of these show reduced Sox9 expression. B. Ki67 labeling after NMDA treatment in an adult mouse showing some of the *Ascl1*-expressing Müller cells (GFP+) remain in the mitotic cell cycle for at least one week after the injury.

Figure S6. A-C. Retinal sections through *Ascl1*-GFP mouse retina after receiving tamoxifen at P12 and NMDA at P14 after one week survival, to show examples of the range of neuronal cell morphology observed. (A,B). Arrows point to amacrine-like cells, and arrowheads point to cells with bipolar morphology. C. Section through the retina of an *Ascl1*-GFP mouse (tamoxifen at P12 and NMDA at P14, two week survival) co-labeled for HuC/D, an amacrine cell marker.

Figure S7. A-C. Retinal sections through *Ascl1*-GFP mouse retina after receiving tamoxifen at P12 and NMDA at P14 after two week survival, to show an example of recoverin labeling (arrow) in *Ascl1*-GFP+ cells in the ONL (inset shows the boxed region at higher magnification). Otx2, red; Recoverin, white; DAPI, blue.

Figure S8. To further assess whether Müller glial derived neurons were able to make synaptic connections with the host neurons, we used the Zeiss LSA 880 Airyscan (Sheppard et al. 2013), which provides resolution to 140 nm. Labeling the section with Ctpb2, in green and GFP in red, the ribbon synapses appear as small green puncta. If the axon of the bipolar cell is making synaptic contacts with amacrine cells in the plexiform layer, green puncta should overlap with the red axonal process. The arrows point to Ctpb2 puncta that resides within the axon of the regenerated bipolar cell. INL, inner plexiform layer; Scale bar = 1 micron.

Figure S9. A-A'''. Cryosection through retinal explant 7 DIV, labeled for *Ascl1*-GFP (green), Otx2 (red), and EdU (white). Arrows show examples of EdU+/Otx2+/*Ascl1*-mCherry+ cells. Scale bar = 50 um. B. Postnatal

day 12 (P12) retinas from hAscl1-mCherry mice were explanted and cultured in for 7 days (7 DIV) in 1% FBS medium and then processed for IHC. Doxycycline added after one DIV. Flatmount of retina showing large increase in EdU+ cells in Ascl1-mCherry mice. Scale bar = 300  $\mu$ m. C. Quantification of EdU+ cells from Ascl1-mCherry (n= 5; six fields per retina and control (no Ascl1) retinas (n=3; six fields per retina). Bars = mean and SEM. \* p= 0.0055.

Figure S10. A,B. Percent of Ascl1-GFP+ cells that express Sox2/Sox9 and Otx2 after NMDA neurotoxic retinal injury at either P14 or P16/P18. After injury at P14, over 50% of the Ascl1-GFP+ cells express Otx2, and only approximately 30% retain Sox2 or Sox9 expression (we found no difference in the % of cells expressing Sox2 or Sox9 and so the data was combined). A small number of cells are labeled for Sox and Otx2. By contrast, after injury at either P16 or P18, the increase in Otx2+ cells still occurs in the Ascl1-GFP+ cells, but many do not down-regulate Sox9, and as a result there is a large increase in the percentage of cells expressing both markers. C. Percent of Ascl1-GFP+ cells expressing Sox2/9 or Otx2 after NMDA damage as a function of the age of damage. One difference between injury at P14 and P16/18 is that the glial Sox2/9 is not reduced as efficiently at P16/18 or in adult MG as it is at P14. Adult data from Figure 2. D. Examples of Ascl1-GFP+ cells after NMDA injury at P16; the response is more similar to the adult than that observed after P14 injury, in that Ascl1-GFP+ cells do not develop characteristics of retinal neurons, though they show expression of Otx2.

Figure S11. Pie chart showing the degree of overlap between P0-DHS/Ascl1-ChIP-seq peaks that are accessible at P7 and in Müller glia (MG). The majority of the sites for Ascl1 binding that are present at P0 and remain accessible at P7 are still accessible in the P12 Müller glia. B. GREAT analysis of the Gene Ontology enriched categories in the overlapping DHSs between adult retina and Müller glia; neural developmental categories as not enriched in the DHSs common between adult retina and Müller glia.

External Databases:  
ENCSR666HFH  
GSM1014188  
GSM1014198  
GSM1014175

**Supplemental Table 1.** List of antibodies.

| <b>Protein</b> | <b>Vendor</b>                           | <b>Host</b>       | <b>Dilution for IHC</b> |
|----------------|-----------------------------------------|-------------------|-------------------------|
| Ascl1          | BD Biosystems                           | Mouse             | 1:100                   |
| Brn3           | Santa Cruz Biotechnology                | Goat              | 1:100                   |
| Cabp5          | Gift from Dr. F. Haeseleer              | Rabbit            | 1:200                   |
| Ctbp2          | BD Biosciences                          | Mouse IgG1        | 1:500                   |
| GFAP           | DAKO                                    | Rabbit            | 1:500                   |
| GFP            | Santa Cruz Biotechnology                | Chicken           | 1:500                   |
| HuC/D          | Invitrogen                              | Mouse             | 1:100                   |
| Otx2           | R&D Systems                             | Goat/Biotinylated | 1:100                   |
| Otx2           | Abcam                                   | Rabbit            | 1:250                   |
| Pax6           | Convance                                | Rabbit            | 1:250                   |
| PH3            | Novus                                   | Rat               | 1:500                   |
| Recoverin      | Chemicon                                | Rabbit            | 1:1000                  |
| Sox2           | Santa Cruz Biotechnology                | Rabbit            | 1:1000                  |
| Sox9           | Millipore                               | Goat              | 1:200                   |
| VIAAT          | Synaptic Systems                        | Guinea Pig        | 1:500                   |
| PKC            | Sigma                                   | Mouse             | 1:250                   |
| AP2a           | Developmental Systems<br>Hybridoma Bank | Mouse             | 1:250                   |

**Supplemental Table 2.** List of qRT-PCR primers.

| <b>Gene</b>   | <b>Forward</b>         | <b>Reverse</b>           |
|---------------|------------------------|--------------------------|
| <i>Gapdh</i>  | GGCATTGCTCTCAATGACAA   | CTTGCTCAGTGTCCCTTGCTG    |
| <i>hAscl1</i> | CATCTCCCCCAACTACTCCA   | CAGTTGGTGAAGTCGAGAAGC    |
| <i>Glast</i>  | ACCAAAAGCAACGGAGAAGAG  | GGCATTCCGAAACAGGTAACTC   |
| <i>Glul</i>   | GTTCCCACTTGAACAAAGGCA  | ACCCAGATATACATGGCTTGGA   |
| <i>Hes5</i>   | AGTCCCAAGGAGAAAAACCGA  | GCTGTGTTTCAGGTAGCTGAC    |
| <i>Heyl</i>   | CAGCCCTTCGCAGATGCAA    | CCAATCGTCGCAATTCAGAAAG   |
| <i>Mnfg</i>   | ATGCACTGCCGACTTTTTTCG  | CCTGGGTTCCGTTGGTTCAG     |
| <i>Olig2</i>  | ATGCACGACCTCAACATCGCCA | GTGAGCATGAGGATGTAGTTTCGC |
| <i>Otx2</i>   | ACCAAGGATCATGGTCCTGTC  | CCTGTGCCTGTACCAGCTC      |

**Supplementary Table 3.** Progenitor gene promoters analyzed for DHSs

| Chr   | start     | end       | gene    |
|-------|-----------|-----------|---------|
| chr1  | 93309799  | 93310799  | Hes6    |
| chr10 | 86956405  | 86957405  | Ascl1   |
| chr12 | 12948642  | 12949642  | Mycn    |
| chr15 | 78603875  | 78604875  | Mfng    |
| chr16 | 91224794  | 91225794  | Olig2   |
| chr17 | 15512787  | 15513787  | Dll1    |
| chr2  | 119150519 | 119151519 | Dll4    |
| chr3  | 127335062 | 127336062 | Neurog2 |
| chr4  | 122909798 | 122910798 | Heyl    |
| chr4  | 133574731 | 133575731 | Lin28a  |
| chr5  | 114723770 | 114724770 | Foxn4   |
| chr7  | 29086804  | 29087804  | Dll3    |
| chr7  | 152081436 | 152082436 | Fgf15   |
| chr9  | 91260637  | 91261637  | Zic1    |
| chrX  | 68808167  | 68809167  | Hmgb3   |

### Supplementary References

1. J. Pollak *et al.*, ASCL1 reprograms mouse Muller glia into neurogenic retinal progenitors. *Development* **140**, 2619 (Jun, 2013).
2. Y. Ueki *et al.*, P53 is required for the developmental restriction in Muller glial proliferation in mouse retina. *Glia* **60**, 1579 (Oct, 2012).
3. B. Langmead, C. Trapnell, M. Pop, S. L. Salzberg, Ultrafast and memory-efficient alignment of short DNA sequences to the human genome. *Genome Biol* **10**, R25 (2009).
4. S. Neph *et al.*, BEDOPS: high-performance genomic feature operations. *Bioinformatics* **28**, 1919 (Jul 15, 2012).
5. S. John *et al.*, Genome-scale mapping of DNase I hypersensitivity. *Curr Protoc Mol Biol* **Chapter 27**, Unit 21 27 (Jul, 2013).
6. R. R. Waclaw, B. Wang, Z. Pei, L. A. Ehrman, K. Campbell, Distinct temporal requirements for the homeobox gene *Gsx2* in specifying striatal and olfactory bulb neuronal fates. *Neuron* **63**, 451 (Aug 27, 2009).
7. T. Mori *et al.*, Inducible gene deletion in astroglia and radial glia--a valuable tool for functional and lineage analysis. *Glia* **54**, 21 (Jul, 2006).
8. A. Lopez-Juarez *et al.*, *Gsx2* controls region-specific activation of neural stem cells and injury-induced neurogenesis in the adult subventricular zone. *Genes Dev* **27**, 1272 (Jun 1, 2013).



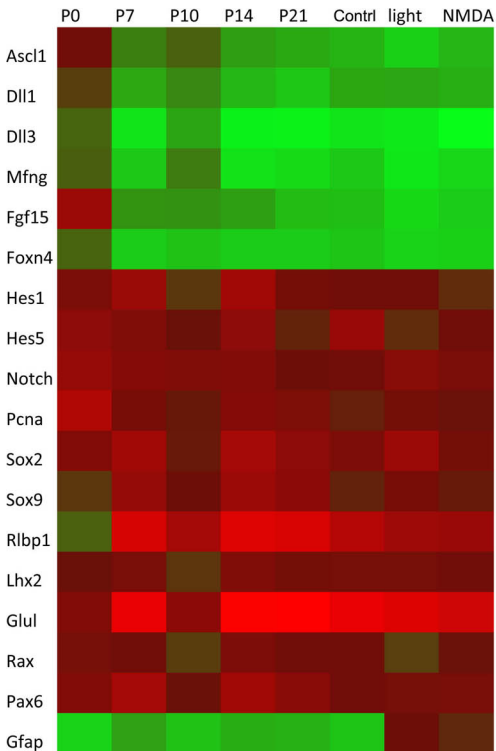

Low High

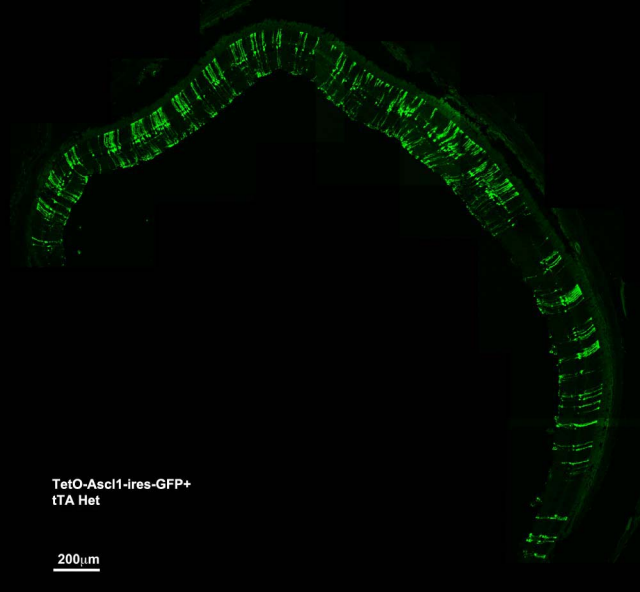

TetO-Ascl1-ires-GFP+  
tTA Het

200µm

**mAscl1+**

**GFP**

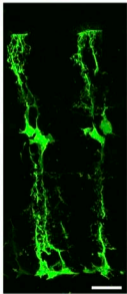

**Ascl1**

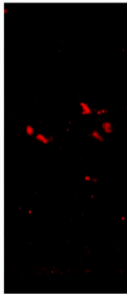

**Merge**

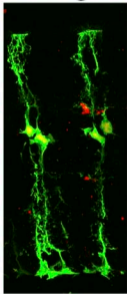

GCL  
INL  
ONL

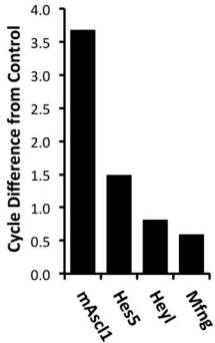

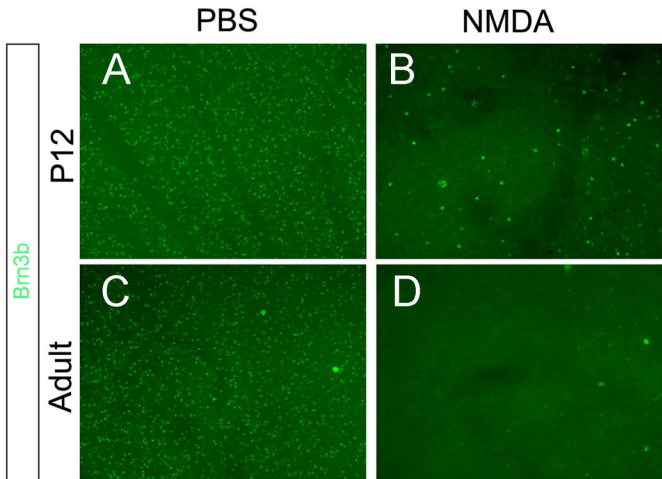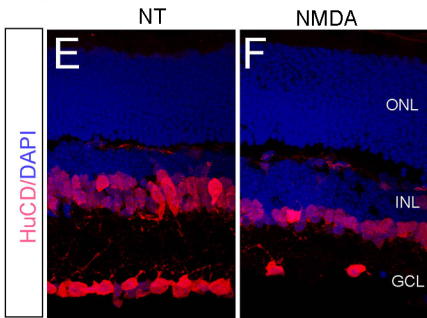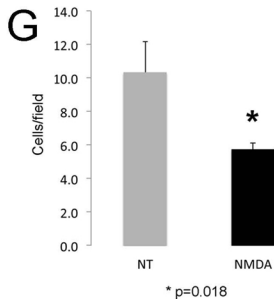

## Ascl1, Light Damage

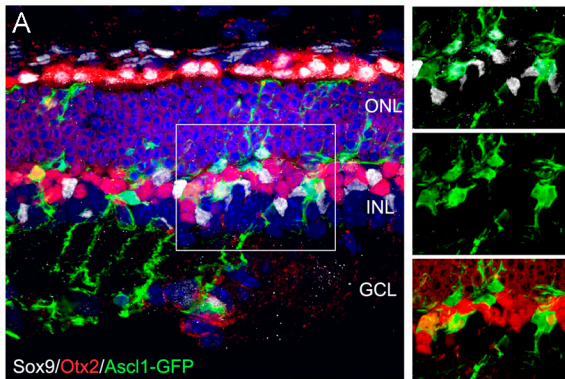

## Ascl1, NMDA

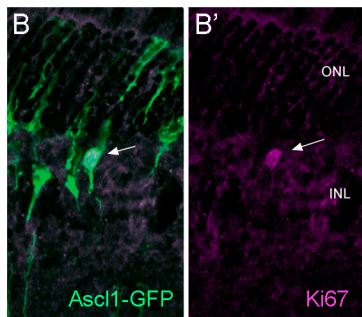

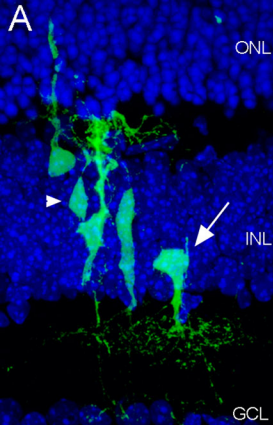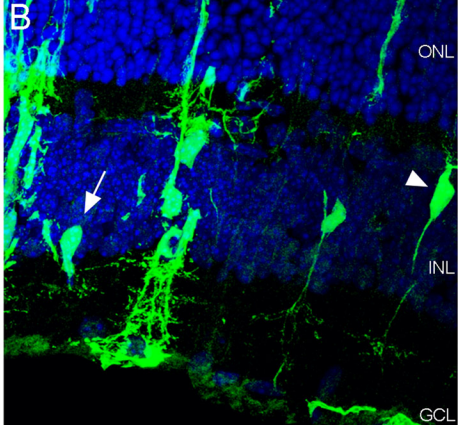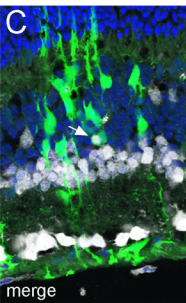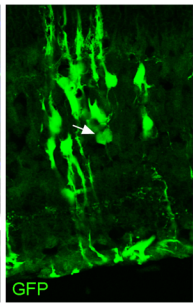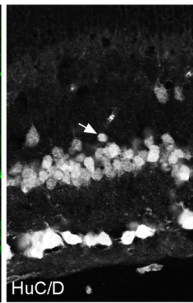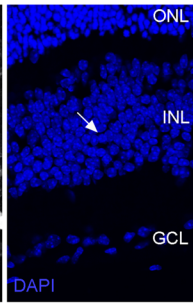

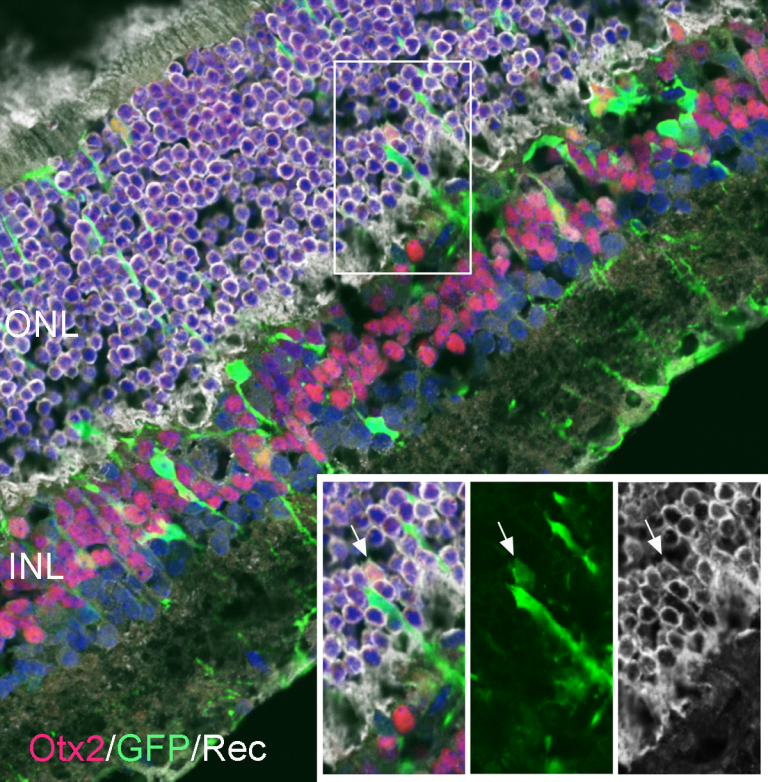

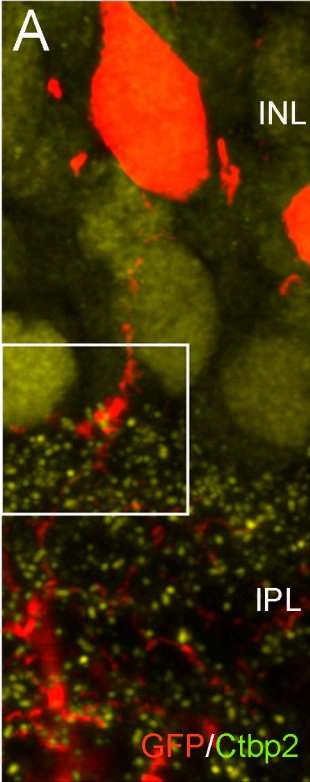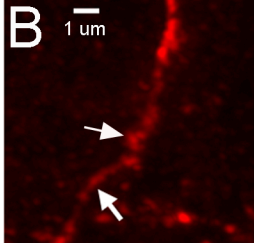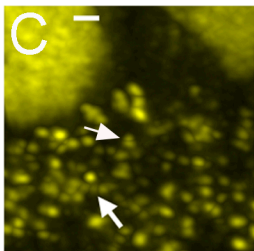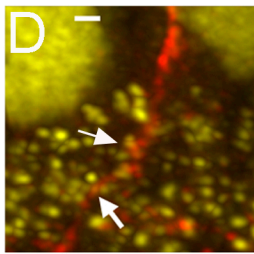



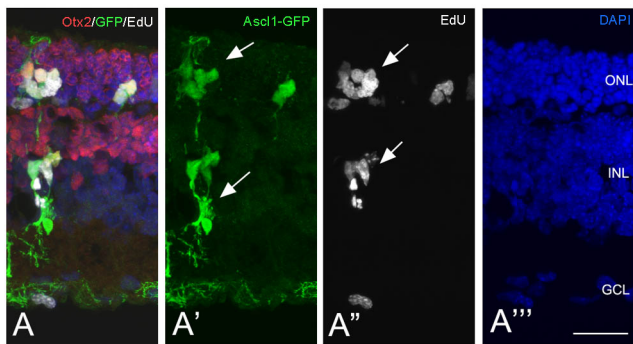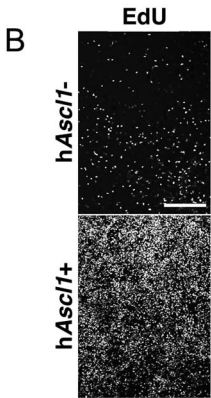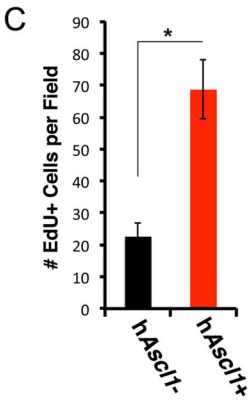

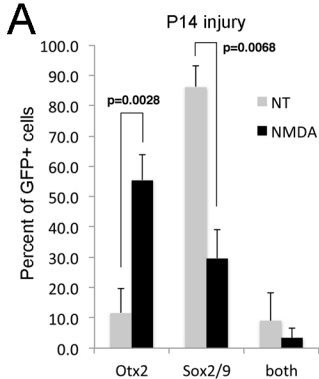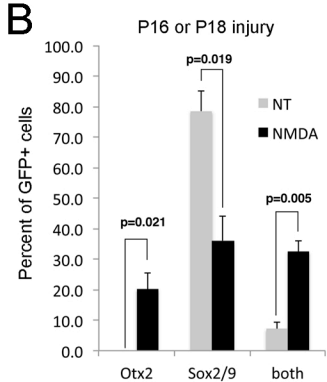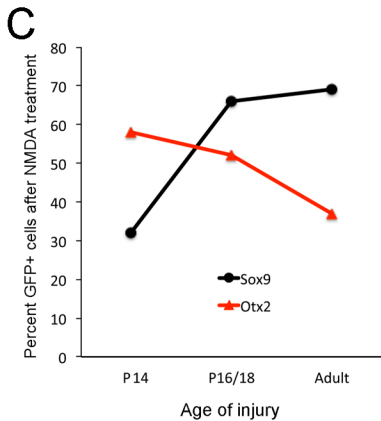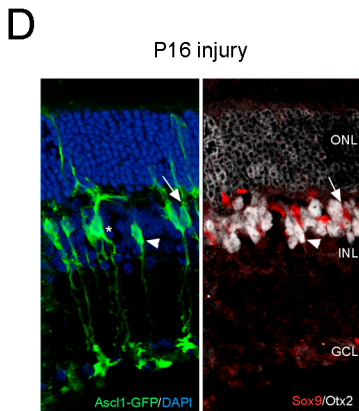

A

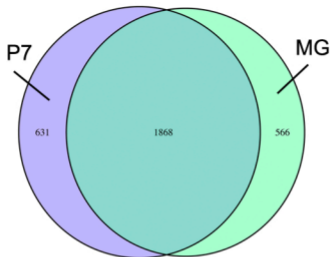

B

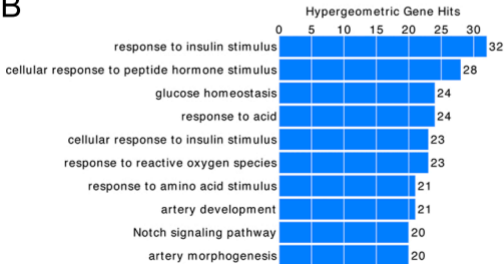

Supplement: pnas.1510595112.sapp.pdf [file pnas.1510595112.sapp.pdf]
